# Supplementary material
Source: HighWire-hosted journal article supplement (http://www.cmaj.ca/highwire/filestream/58899/field_highwire_adjunct_files/0/glucose-haidar-1-at.pdf)
Supplement: glucose-haidar-1-at.pdf [file glucose-haidar-1-at.pdf]

## **Appendix 1 (as supplied by the authors): Study Exclusion Criteria**

1. Clinically significant nephropathy, neuropathy or retinopathy as judged by the investigator.
2. Recent (< 6 months) acute macrovascular event e.g. acute coronary syndrome or cardiac surgery.
3. A recent injury to body or limb, muscular disorder, use of any medication or other significant medical disorder if that injury, medication or disease in the judgment of the investigator will affect the completion of the exercise protocol.
4. Pregnancy.
5. Severe hypoglycemic episode within two weeks of screening.
6. Current use of glucocorticoid medication (by any route of administration except low dose stable inhaled).
7. Known or suspected allergy to the trial products or meal contents.
8. Other serious medical illness likely to interfere with study participation or with the ability to complete the trial by the judgment of the investigator.
9. Anticipating a significant change in exercise regimen between admissions (i.e. starting or stopping an organized sport).
10. Failure to comply with team's recommendations (e.g. not willing to eat snack, not willing to change pump parameters, etc).
